# Supplementary material
Source: PubMed Central journal article supplement (PMC2945534)
Supplement: supp_M109.094284_jbc.M109.094284-1.pdf [file supp_M109.094284_jbc.M109.094284-1.pdf]

Table 1. Primers used in this study

| <u>Primers for qRT-PCR</u>                      |     |                                                 |
|-------------------------------------------------|-----|-------------------------------------------------|
| tapasin                                         | fw  | 5'-ACACTGCGAGATGAGCCGCTTC-3'                    |
|                                                 | rev | 5'-TGAGGACGGTCAGCACCCTGT-3'                     |
| TAP1                                            | fw  | 5'-TGCCTAAGAAGCTGGGAAAA-3'                      |
|                                                 | rev | 5'-GTAAGCCAAGGCCTCCTTCT-3'                      |
| TAP2                                            | fw  | 5'-CGGTGCTAAAGGAGATCCAG-3'                      |
|                                                 | rev | 5'-CCATCACCCCTCCGTATGACT-3'                     |
| LMP2                                            | fw  | 5'-TCTTCTGTGCCCTCTCAGGT-3'                      |
|                                                 | rev | 5'-TGGTCCCAGCCAGCTACTAT-3'                      |
| <u>Primers for APM promoter cloning</u>         |     |                                                 |
| tapasin                                         | fw  | 5'-GCATCCTAGAGTCACAGAGC-3'                      |
|                                                 | rev | 5'-GGTGCTACGATCTCTCCTAC-3'                      |
| TAP1/LMP2                                       | fw  | 5'-AAAAAGCTTCATCTCAGCAGAGCGGGG-3'               |
|                                                 | rev | 5'-AAAAAGCTT CATCGAGCGTGAGCTGTCC-3'             |
| <u>Mutagenesis primers for tapasin promoter</u> |     |                                                 |
| NF-κB(-82)                                      | fw  | 5'-CCCTTGCCATGAGAATCCCAAATTGAGTTGTCATGAAAG-3'   |
|                                                 | rev | 5'-CTTTCATGACAACCTCAATTTGGGATTCTCATGGCAAGGGT-3' |
| p300(-309)                                      | fw  | 5'-GGTCTGGGAACGCGGGATCCTGGTTTTAAGGGAGGTGG-3'    |
|                                                 | rev | 5'-CCACCTCCCTTAAAACCAGGATCCCGCGTTCCAGACC-3'     |
| E2F(-146)                                       | fw  | 5'-CGGCAACTCTGTTTGGATCCTGTGGGCGGCGTT-3'         |
|                                                 | rev | 5'-GGAACGCCGCCACAGGATCCAAACAGAGTTGCCG-3'        |
| E2F(-229)                                       | fw  | 5'-GGGCTCAAAGTTGGATCCGTCCAGTGAGCCAAGGGGGTGGG-3' |
|                                                 | rev | 5'-CCACCCCCTTGGCTCACTGGACGGATCCACTTTGAGCCC-3'   |
| SP1(-206)                                       | fw  | 5'-CCAGTGAGCCAAGGGGAAAGGTGCAGGGCGAGG-3'         |
|                                                 | rev | 5'-CCTCGCCCTGCACCTTTCCCCTTGGCTCACTGG-3'         |
| p300(-191)                                      | fw  | 5'-GGGTGCAGGGCGAGGATCCGCTGGAGAGCTACAG-3'        |
|                                                 | rev | 5'-CTGTAGCTCTCCAGCGGATCCTCGCCCTGCACCC-3'        |
| NF-κB(-82)                                      | fw  | 5'-ACCTGACCAGATCGGCGCCTTTCAGTTCCTCACCCCAGC-3'   |
|                                                 | rev | 5'-GCTGGGGTGAGGAATCGGAAAGGCGCCGATCTGGTCAGGT-3'  |
| <u>Mutagenesis primers for TAP1 promoter</u>    |     |                                                 |
| E2F(-103)                                       | fw  | 5'-CGTTCTACCAGCATTTGGATCCCAGAGCAAACCTGAGCAGG-3' |
|                                                 | rev | 5'-CCTGCTCAGGTTTGTCTGGGATCCAAATGCTGGTAGAACG-3'  |
| E2F(-453)                                       | fw  | 5'-CCCGGGACTCCATGGGCACGCCCTCGGACC-3'            |
|                                                 | rev | 5'-GGTCCGAGGGCGTGCCATGGAGTCCCGGG-3'             |
| <u>Mutagenesis primers for TAP2 promoter</u>    |     |                                                 |
| P300(-1257)                                     | fw  | 5'-GGAGGGACCTGAGGTCTCTCCCTCCTCCATTTTCC-3'       |
|                                                 | rev | 5'-GGAAAATGGAGGAGGGAGAGACCTCAGGTCCCTCC-3'       |
| P300(-649)                                      | fw  | 5'-CCCGAGAGTTAGCAGGGGTCTCGCCATTCCCAAACC-3'      |
|                                                 | rev | 5'-GGTTTGGGAATGGGCGAGACCCCTGCTAACTCTCGGG-3'     |
| P300(-318)                                      | fw  | 5'-GGGTCTTCTGCCGCTTGGTCTCTGCCCCGTGTCC-3'        |
|                                                 | rev | 5'-GGACACGGGGCAGAGACCAAGCGGCAGAAGACCC-3'        |
| E2F(-86)                                        | fw  | 5'-GGCTCAGGGTGGATTTGGATCCGGAGGCTCGTAACCAGGG-3'  |
|                                                 | rev | 5'-CCCTTGGCATGAGTCCCCGGATCCAAATCCACCCTGAGCC-3'  |

| <u>Primers for RNA Pol II ChIP assays</u>                |     |                                 |
|----------------------------------------------------------|-----|---------------------------------|
| tapasin                                                  | fw  | 5'-AGGAATAGACACACTGGGAAGG-3'    |
|                                                          | rev | 5'-AGCAGTGTGGCAGGTTTCTTAG-3'    |
| TAP1                                                     | fw  | 5'-CGTCTCTACCTGGTTCTGGTTC-3'    |
|                                                          | rev | 5'-CTTCCCGGGACTACTTTACTCT-3'    |
| LMP2                                                     | fw  | 5'-TCCACAGTGAACGTAGGGTATC-3'    |
|                                                          | rev | 5'-ACCTTCTCTCAGGTGCTTCATC-3'    |
| TAP2                                                     | fw  | 5'-CAGTGAAGTGAAAGCGAAAGC-3'     |
|                                                          | rev | 5'-TGCTAACTCTCGGGTTCTATCC-3'    |
| <u>Primers for p300 ChIP assays</u>                      |     |                                 |
| tapasin                                                  | fw  | 5'-CTCTGTTTGCTGGGACCTG-3'       |
|                                                          | rev | 5'-TAGCTCTCCAGCCACTCCTC-3'      |
| TAP2                                                     | fw  | 5'-AAACCCTTGGCGTCATCAT-3'       |
|                                                          | rev | 5'-CGGTAGCCTTAGATGGCTTG-3'      |
| LMP2                                                     | fw  | 5'-CCCTGAGTGAGGACAAGCTC-3'      |
|                                                          | rev | 5'-GTCTGGGCAAAGTTCTCAGG-3'      |
| <u>Primers for E2F1 ChIP assays</u>                      |     |                                 |
| tapasin                                                  | fw  | 5'-GAGAGCTACAGACAGGGTTTCG-3'    |
|                                                          | rev | 5'-TGGTGCTACGATCTCTCCTACC-3'    |
| TAP1                                                     | fw  | 5'-GAACCAACAGGGAGAAGATTCC-3'    |
|                                                          | rev | 5'-TTCTAGTCAGCTCCACCAGCTC-3'    |
| TAP2                                                     | fw  | 5'-CATGGCTTTACTTGGGTTGC-3'      |
|                                                          | rev | 5'-CTCCCACCAGAGCTCTTAGC-3'      |
| LMP2                                                     | fw  | 5'-TCCACAGTGAACGTAGGGTATC-3'    |
|                                                          | rev | 5'-ACCTTCTCTCAGGTGCTTCATC-3'    |
| <u>Oligonucleotides for electro mobility shift assay</u> |     |                                 |
| p300(-309)                                               | fw  | 5'-GAACGCGGGAGTGTGGTTT-3'       |
|                                                          | rev | 5'-AAAACCACACTCCCGCGTTC-3'      |
| E2F(-146)                                                | fw  | 5'-ACTCTGTTGGCCCCTGTGG-3'       |
|                                                          | rev | 5'-CCACAGGGGCCAAACAGAGT-3'      |
| E2F(-229)                                                | fw  | 5'-CTCAAAGTTGGCGCAGTCCG-3'      |
|                                                          | rev | 5'-CGGACTGCGCCAAC TTTGAG-3'     |
| <u>siRNA sequences</u>                                   |     |                                 |
| E2F1                                                     |     | 5'-CCUGGAGCAAGAAGCAGUAUUGCCA-3' |

fw: forward primer; rev : reverse primer; siRNA: short interfering RNA
