# Supplementary material
Source: PubMed Central journal article supplement (PMC2945534)

Figure 2

A

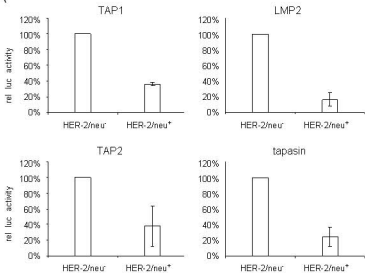

B

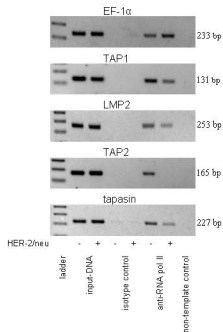

Supplement: supp_M109.094284_jbc.M109.094284-2.pdf [file supp_M109.094284_jbc.M109.094284-2.pdf]

Figure 4

A

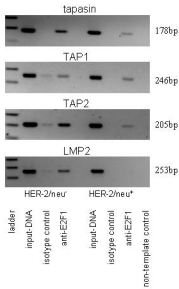

B

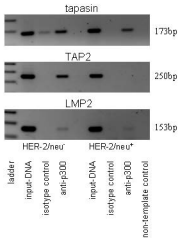

Supplement: supp_M109.094284_jbc.M109.094284-3.pdf [file supp_M109.094284_jbc.M109.094284-3.pdf]

Figure 6

A

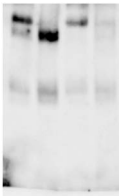

|            |   |   |   |   |
|------------|---|---|---|---|
| HER2/neu   | - | + | - | + |
| E2F-oligo  | + | + | + | + |
| competitor | - | - | + | + |

B

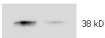

|          |   |   |
|----------|---|---|
| HER2/neu | - | + |
|----------|---|---|

Supplement: supp_M109.094284_jbc.M109.094284-4.pdf [file supp_M109.094284_jbc.M109.094284-4.pdf]

Figure 1

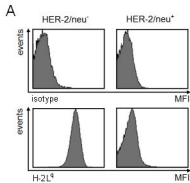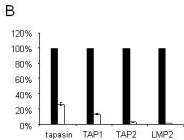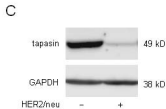

Supplement: supp_M109.094284_jbc.M109.094284-5.pdf [file supp_M109.094284_jbc.M109.094284-5.pdf]

Figure 3

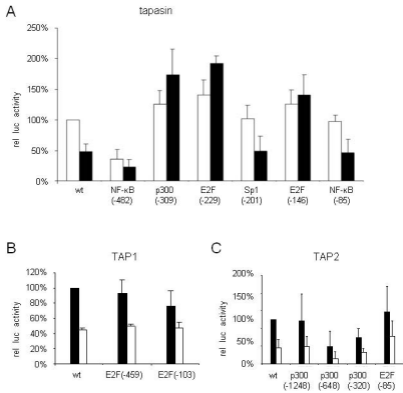

Supplement: supp_M109.094284_jbc.M109.094284-6.pdf [file supp_M109.094284_jbc.M109.094284-6.pdf]

Figure 5

A

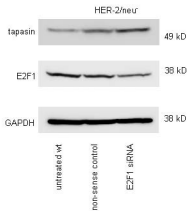

B

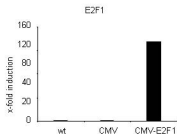

C

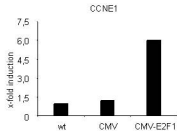

D

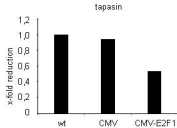

Supplement: supp_M109.094284_jbc.M109.094284-7.pdf [file supp_M109.094284_jbc.M109.094284-7.pdf]
